# Supplementary material for: Relative Validity and Reproducibility of a Web-Based Semi-Quantitative Food Frequency Questionnaire in the Danish Diet, Cancer, and Health—Next Generations MAX Study
Source: MDPI journal article supplement (doi:10.3390/nu15102389), 2023-05-19
Supplement: s1 [file s1]

**Table S2.** Nutrient residual intakes from the FFQ<sub>baseline</sub> and the FFQ<sub>12months</sub> for Bland-Altman limits of agreement (LOA), Spearman's correlation coefficient and cross-classification (n=415).

| Nutrients <sup>a</sup>  | p-value <sup>c</sup> | Bland-Altman<br>LOA <sup>d</sup> |                | Spearman's Correlation Coefficient |                             | Cross-classification    |                             |                             |                                        |
|-------------------------|----------------------|----------------------------------|----------------|------------------------------------|-----------------------------|-------------------------|-----------------------------|-----------------------------|----------------------------------------|
|                         |                      | Lower                            | Upper          | Crude (95% CI)                     | Energy-adjusted<br>(95% CI) | Same<br>quartile<br>(%) | Adjacent<br>quartile<br>(%) | Opposite<br>quartile<br>(%) | Extreme<br>opposite<br>quartile<br>(%) |
| Protein, g              | 0.9900               | -23                              | 32             | 0.62 (0.55-0.69)                   | 0.65 (0.58-0.71)            | 48                      | 38                          | 12                          | 2                                      |
| Total fat, g            | 0.7695               | -21                              | 25             | 0.70 (0.64-0.75)                   | 0.64 (0.57-0.70)            | 48                      | 38                          | 12                          | 2                                      |
| SFA, g                  | 0.7316               | -30                              | 39             | 0.69 (0.63-0.74)                   | 0.68 (0.61-0.73)            | 49                      | 39                          | 11                          | 1                                      |
| MUFA, g                 | 0.9923               | -25                              | 34             | 0.69 (0.63-0.74)                   | 0.61 (0.54-0.67)            | 44                      | 41                          | 13                          | 2                                      |
| PUFA, g                 | 0.9548               | -31                              | 46             | 0.69 (0.63-0.75)                   | 0.66 (0.60-0.72)            | 48                      | 41                          | 9                           | 1                                      |
| EPA, g <sup>b</sup>     | 0.1712               | - <sup>e</sup>                   | - <sup>e</sup> | 0.71 (0.64-0.76)                   | 0.63 (0.56-0.70)            | 48                      | 39                          | 9                           | 3                                      |
| DHA, g <sup>b</sup>     | 0.4834               | - <sup>e</sup>                   | - <sup>e</sup> | 0.72 (0.66-0.78)                   | 0.65 (0.58-0.72)            | 48                      | 40                          | 8                           | 3                                      |
| Cholesterol, mg         | 0.9953               | - <sup>e</sup>                   | - <sup>e</sup> | 0.68 (0.63-0.74)                   | 0.63 (0.56-0.70)            | 46                      | 40                          | 11                          | 2                                      |
| Carbohydrate, g         | 0.4255               | -14                              | 19             | 0.65 (0.59-0.71)                   | 0.69 (0.62-0.74)            | 50                      | 37                          | 11                          | 2                                      |
| Total sugar, g          | 0.6321               | -29                              | 51             | 0.68 (0.61-0.74)                   | 0.68 (0.62-0.74)            | 51                      | 38                          | 9                           | 2                                      |
| Fibre, g                | 0.9633               | -32                              | 48             | 0.69 (0.63-0.74)                   | 0.74 (0.68-0.79)            | 53                      | 40                          | 7                           | 1                                      |
| Alcohol, g <sup>b</sup> | 0.0128               | - <sup>e</sup>                   | - <sup>e</sup> | 0.81 (0.76-0.85)                   | 0.74 (0.69-0.79)            | 52                      | 40                          | 7                           | 1                                      |
| Sodium, mg              | 0.8545               | -26                              | 36             | 0.61 (0.54-0.67)                   | 0.57 (0.49-0.65)            | 46                      | 40                          | 12                          | 3                                      |
| Potassium, mg           | 0.6415               | -23                              | 27             | 0.66 (0.59-0.72)                   | 0.69 (0.62-0.75)            | 49                      | 41                          | 8                           | 2                                      |
| Calcium, mg             | 0.8905               | -41                              | 66             | 0.69 (0.62-0.74)                   | 0.72 (0.66-0.77)            | 56                      | 35                          | 7                           | 2                                      |
| Magnesium, mg           | 0.9294               | -18                              | 23             | 0.67 (0.60-0.73)                   | 0.79 (0.73-0.83)            | 56                      | 36                          | 7                           | 1                                      |
| Phosphorus, mg          | 0.8158               | -22                              | 34             | 0.64 (0.57-0.70)                   | 0.69 (0.63-0.74)            | 51                      | 38                          | 9                           | 1                                      |
| Iron, mg                | 0.8702               | -19                              | 25             | 0.65 (0.58-0.71)                   | 0.72 (0.66-0.76)            | 52                      | 39                          | 8                           | 1                                      |
| Copper, mg              | 0.7008               | -48                              | 95             | 0.69 (0.63-0.74)                   | 0.70 (0.63-0.75)            | 53                      | 40                          | 5                           | 2                                      |
| Zink, mg                | 0.8276               | -20                              | 27             | 0.62 (0.55-0.69)                   | 0.64 (0.58-0.70)            | 47                      | 38                          | 14                          | 1                                      |
| Selenium, µg            | 0.7069               | - <sup>e</sup>                   | - <sup>e</sup> | 0.68 (0.61-0.73)                   | 0.64 (0.57-0.71)            | 49                      | 40                          | 9                           | 2                                      |
| Iodine, µg              | 0.8123               | -44                              | 62             | 0.63 (0.56-0.69)                   | 0.62 (0.55-0.68)            | 51                      | 35                          | 12                          | 2                                      |
| Retinol, µg             | 0.9969               | - <sup>e</sup>                   | - <sup>e</sup> | 0.68 (0.62-0.74)                   | 0.67 (0.61-0.73)            | 48                      | 41                          | 9                           | 2                                      |
| Beta carotene, µg       | 0.8989               | -63                              | 162            | 0.70 (0.63-0.75)                   | 0.66 (0.59-0.72)            | 50                      | 37                          | 11                          | 2                                      |
| Vitamin A, µg           | 0.7489               | -51                              | 96             | 0.65 (0.58-0.70)                   | 0.52 (0.45-0.60)            | 43                      | 37                          | 16                          | 4                                      |

|                             |        |                    |                   |                  |                  |    |    |    |   |
|-----------------------------|--------|--------------------|-------------------|------------------|------------------|----|----|----|---|
| Vitamin D, µg               | 0.9200 | - <sup>e</sup>     | - <sup>e</sup>    | 0.69 (0.62-0.74) | 0.67 (0.60-0.73) | 52 | 37 | 10 | 2 |
| Vitamin E, mg               | 0.8330 | -35                | 54                | 0.74 (0.69-0.79) | 0.74 (0.68-0.79) | 54 | 37 | 7  | 1 |
| Vitamin K, µg <sup>b</sup>  | 0.4585 | -299 <sup>f</sup>  | 267 <sup>f</sup>  | 0.73 (0.67-0.78) | 0.66 (0.60-0.72) | 49 | 40 | 9  | 2 |
| Thiamine, mg <sup>b</sup>   | 0.9343 | -0.46 <sup>f</sup> | 0.45 <sup>f</sup> | 0.62 (0.55-0.68) | 0.63 (0.56-0.69) | 48 | 38 | 11 | 3 |
| Riboflavin, mg              | 0.9966 | -33                | 44                | 0.68 (0.62-0.74) | 0.74 (0.68-0.78) | 55 | 37 | 7  | 1 |
| Niacin, mg                  | 0.8886 | -27                | 39                | 0.71 (0.65-0.76) | 0.71 (0.65-0.77) | 49 | 41 | 9  | 1 |
| Vitamin B6, mg <sup>b</sup> | 0.5236 | -0.76 <sup>f</sup> | 0.67 <sup>f</sup> | 0.64 (0.57-0.70) | 0.62 (0.54-0.69) | 50 | 36 | 11 | 3 |
| Vitamin B12, µg             | 0.9035 | - <sup>e</sup>     | - <sup>e</sup>    | 0.64 (0.56-0.70) | 0.61 (0.54-0.67) | 50 | 34 | 13 | 2 |
| Vitamin C, mg               | 0.5670 | -53                | 90                | 0.69 (0.63-0.75) | 0.64 (0.57-0.71) | 49 | 38 | 9  | 4 |
| Folate, µg <sup>b</sup>     | 0.2102 | -301 <sup>f</sup>  | 234 <sup>f</sup>  | 0.70 (0.63-0.76) | 0.69 (0.62-0.75) | 51 | 39 | 7  | 2 |

<sup>a</sup>Based on double log-transformed energy adjusted nutrient intake by the residual method. <sup>b</sup>EPA, DHA, alcohol, vitamin K, thiamine, vitamin B6 and folate are based on crude nutrient intake and afterwards energy-adjusted by the residual method. <sup>c</sup>p-value, test of difference in intake between FFQbaseline and FFQ12months by Wilcoxon signed-rank test. <sup>d</sup>Bland-Altman limits of agreement (LOA) are reported as percentage difference. <sup>e</sup>Bland-Altman limits of agreement (LOA) are not reported as LOA depend on the level of the nutrient. <sup>f</sup>Bland-Altman limits of agreement (LOA) are reported as unit difference.
