# Supplementary material for: Relative Validity and Reproducibility of a Web-Based Semi-Quantitative Food Frequency Questionnaire in the Danish Diet, Cancer, and Health—Next Generations MAX Study
Source: MDPI journal article supplement (doi:10.3390/nu15102389), 2023-05-19
Supplement: s1 [file s1]

**Table S1.** Nutrient residual intakes from the FFQ<sub>baseline</sub> compared with the 24-HDRs for Wilcoxon sing-rank test, Bland-Altman (LOA), Spearman's correlation coefficient and cross-classification (n=289).

| Nutrients <sup>a</sup>  | p-value <sup>c</sup> | Bland-Altman<br>LOA <sup>d</sup> |                | Spearman's Correlation<br>Coefficient |                                 | Cross-classification    |                             |                             |                                        |
|-------------------------|----------------------|----------------------------------|----------------|---------------------------------------|---------------------------------|-------------------------|-----------------------------|-----------------------------|----------------------------------------|
|                         |                      | Lower                            | Upper          | Crude<br>(95% CI)                     | Energy-<br>adjusted<br>(95% CI) | Same<br>quartile<br>(%) | Adjacent<br>quartile<br>(%) | Opposite<br>quartile<br>(%) | Extreme<br>opposite<br>quartile<br>(%) |
| Protein, g              | 0.9484               | -29                              | 42             | 0.26 (0.14-0.37)                      | 0.48 (0.38-0.56)                | 41                      | 38                          | 17                          | 4                                      |
| Total fat, g            | 0.6999               | -26                              | 35             | 0.26 (0.14-0.38)                      | 0.44 (0.34-0.52)                | 33                      | 46                          | 17                          | 4                                      |
| SFA, g                  | 0.8726               | -38                              | 63             | 0.32 (0.21-0.42)                      | 0.45 (0.35-0.54)                | 39                      | 37                          | 21                          | 3                                      |
| MUFA, g                 | 0.7015               | -38                              | 63             | 0.23 (0.10-0.34)                      | 0.37 (0.27-0.47)                | 36                      | 38                          | 20                          | 6                                      |
| PUFA, g                 | 0.7704               | -43                              | 83             | 0.22 (0.11-0.33)                      | 0.37 (0.26-0.47)                | 30                      | 47                          | 17                          | 6                                      |
| EPA, g <sup>b</sup>     | 0.2053               | - <sup>e</sup>                   | - <sup>e</sup> | 0.20 (0.09-0.31)                      | 0.21 (0.10-0.31)                | 32                      | 37                          | 24                          | 7                                      |
| DHA, g <sup>b</sup>     | 0.1810               | - <sup>e</sup>                   | - <sup>e</sup> | 0.26 (0.15-0.37)                      | 0.26 (0.15-0.37)                | 29                      | 42                          | 21                          | 8                                      |
| Cholesterol, mg         | 0.3378               | - <sup>e</sup>                   | - <sup>e</sup> | 0.31 (0.20-0.42)                      | 0.37 (0.25-0.48)                | 35                      | 39                          | 19                          | 6                                      |
| Carbohydrate, g         | 0.4371               | -23                              | 37             | 0.35 (0.25-0.45)                      | 0.49 (0.39-0.58)                | 40                      | 37                          | 19                          | 4                                      |
| Total sugar, g          | 0.4413               | - <sup>e</sup>                   | - <sup>e</sup> | 0.46 (0.35-0.55)                      | 0.50 (0.39-0.59)                | 41                      | 38                          | 18                          | 3                                      |
| Fibre, g                | 0.8489               | -44                              | 82             | 0.43 (0.32-0.53)                      | 0.53 (0.43-0.62)                | 41                      | 40                          | 16                          | 3                                      |
| Alcohol, g <sup>b</sup> | 0.6808               | - <sup>e</sup>                   | - <sup>e</sup> | 0.55 (0.46-0.63)                      | 0.46 (0.35-0.55)                | 47                      | 33                          | 15                          | 5                                      |
| Sodium, mg              | 0.9854               | - <sup>e</sup>                   | - <sup>e</sup> | 0.23 (0.11-0.33)                      | 0.29 (0.18-0.39)                | 30                      | 39                          | 23                          | 7                                      |
| Potassium, mg           | 0.5604               | - <sup>e</sup>                   | - <sup>e</sup> | 0.29 (0.16-0.40)                      | 0.42 (0.32-0.52)                | 35                      | 41                          | 20                          | 4                                      |
| Calcium, mg             | 0.9009               | -47                              | 86             | 0.28 (0.18-0.39)                      | 0.38 (0.26-0.48)                | 35                      | 43                          | 16                          | 6                                      |
| Magnesium, mg           | 0.7779               | - <sup>e</sup>                   | - <sup>e</sup> | 0.36 (0.25-0.46)                      | 0.55 (0.46-0.63)                | 40                      | 42                          | 15                          | 3                                      |
| Phosphorus, mg          | 0.5708               | -34                              | 55             | 0.28 (0.18-0.38)                      | 0.37 (0.26-0.47)                | 38                      | 36                          | 20                          | 6                                      |
| Iron, mg                | 0.7368               | - <sup>e</sup>                   | - <sup>e</sup> | 0.30 (0.20-0.41)                      | 0.40 (0.29-0.49)                | 35                      | 41                          | 18                          | 6                                      |
| Copper, mg              | 0.2163               | - <sup>e</sup>                   | - <sup>e</sup> | 0.51 (0.40-0.60)                      | 0.56 (0.47-0.64)                | 43                      | 43                          | 12                          | 3                                      |
| Zink, mg                | 0.6166               | - <sup>e</sup>                   | - <sup>e</sup> | 0.23 (0.11-0.34)                      | 0.29 (0.17-0.40)                | 33                      | 39                          | 21                          | 7                                      |
| Selenium, µg            | 0.8389               | - <sup>e</sup>                   | - <sup>e</sup> | 0.29 (0.17-0.39)                      | 0.35 (0.23-0.44)                | 33                      | 43                          | 20                          | 4                                      |
| Iodine, µg              | 0.7304               | - <sup>e</sup>                   | - <sup>e</sup> | 0.30 (0.20-0.41)                      | 0.28 (0.17-0.39)                | 39                      | 31                          | 22                          | 8                                      |
| Retinol, µg             | 0.9591               | - <sup>e</sup>                   | - <sup>e</sup> | 0.47 (0.36-0.56)                      | 0.43 (0.33-0.53)                | 36                      | 44                          | 16                          | 4                                      |
| Beta carotene, µg       | 0.2237               | - <sup>e</sup>                   | - <sup>e</sup> | 0.39 (0.29-0.49)                      | 0.37 (0.26-0.48)                | 36                      | 43                          | 13                          | 7                                      |
| Vitamin A, µg           | 0.5374               | - <sup>e</sup>                   | - <sup>e</sup> | 0.31 (0.19-0.41)                      | 0.28 (0.16-0.39)                | 30                      | 40                          | 22                          | 7                                      |
| Vitamin D, µg           | 0.8621               | - <sup>e</sup>                   | - <sup>e</sup> | 0.25 (0.13-0.36)                      | 0.28 (0.17-0.39)                | 35                      | 35                          | 23                          | 8                                      |
| Vitamin E, mg           | 0.4046               | - <sup>e</sup>                   | - <sup>e</sup> | 0.32 (0.21-0.42)                      | 0.48 (0.39-0.58)                | 37                      | 42                          | 18                          | 3                                      |

|                             |         |                |                |                  |                  |    |    |    |   |
|-----------------------------|---------|----------------|----------------|------------------|------------------|----|----|----|---|
| Vitamin K, µg <sup>b</sup>  | 0.0447  | - <sup>e</sup> | - <sup>e</sup> | 0.33 (0.22-0.42) | 0.30 (0.20-0.40) | 34 | 37 | 23 | 6 |
| Thiamine, mg <sup>b</sup>   | 0.1096  | - <sup>e</sup> | - <sup>e</sup> | 0.28 (0.16-0.38) | 0.29 (0.18-0.40) | 37 | 38 | 17 | 7 |
| Riboflavin, mg              | 0.5959  | -40            | 83             | 0.34 (0.24-0.44) | 0.43 (0.33-0.52) | 40 | 37 | 19 | 3 |
| Niacin, mg                  | 0.9978  | - <sup>e</sup> | - <sup>e</sup> | 0.37 (0.25-0.47) | 0.41 (0.31-0.50) | 35 | 45 | 15 | 5 |
| Vitamin B6, mg <sup>b</sup> | <0.0001 | - <sup>e</sup> | - <sup>e</sup> | 0.24 (0.12-0.35) | 0.18 (0.07-0.29) | 30 | 39 | 21 | 9 |
| Vitamin B12, µg             | 0.4815  | - <sup>e</sup> | - <sup>e</sup> | 0.35 (0.25-0.45) | 0.35 (0.23-0.45) | 35 | 40 | 17 | 8 |
| Vitamin C, mg               | 0.4815  | - <sup>e</sup> | - <sup>e</sup> | 0.36 (0.25-0.46) | 0.42 (0.31-0.51) | 36 | 40 | 20 | 4 |
| Folate, µg <sup>b</sup>     | 0.5245  | - <sup>e</sup> | - <sup>e</sup> | 0.32 (0.21-0.42) | 0.39 (0.31-0.51) | 34 | 41 | 21 | 4 |

<sup>a</sup>Based on double log-transformed energy adjusted nutrient intake by the residual method. <sup>b</sup>EPA, DHA, alcohol, vitamin K, thiamine, vitamin B6 and folate are based on crude nutrient intake and afterwards energy-adjusted by the residual method. <sup>c</sup>p-value , test of difference in intake between FFQbaseline and the mean of 3x24-HDRs by Wilcoxon signed-rank test. <sup>d</sup>Bland-Altman limits of agreement (LOA) are reported as percentage difference. <sup>e</sup>Bland-Altman limits of agreement (LOA) are not reported as LOA depend on the level of the nutrient.
