# Supplementary material for: Relative Validity and Reproducibility of a Web-Based Semi-Quantitative Food Frequency Questionnaire in the Danish Diet, Cancer, and Health—Next Generations MAX Study
Source: MDPI journal article supplement (doi:10.3390/nu15102389), 2023-05-19
Supplement: s1 [file s1]

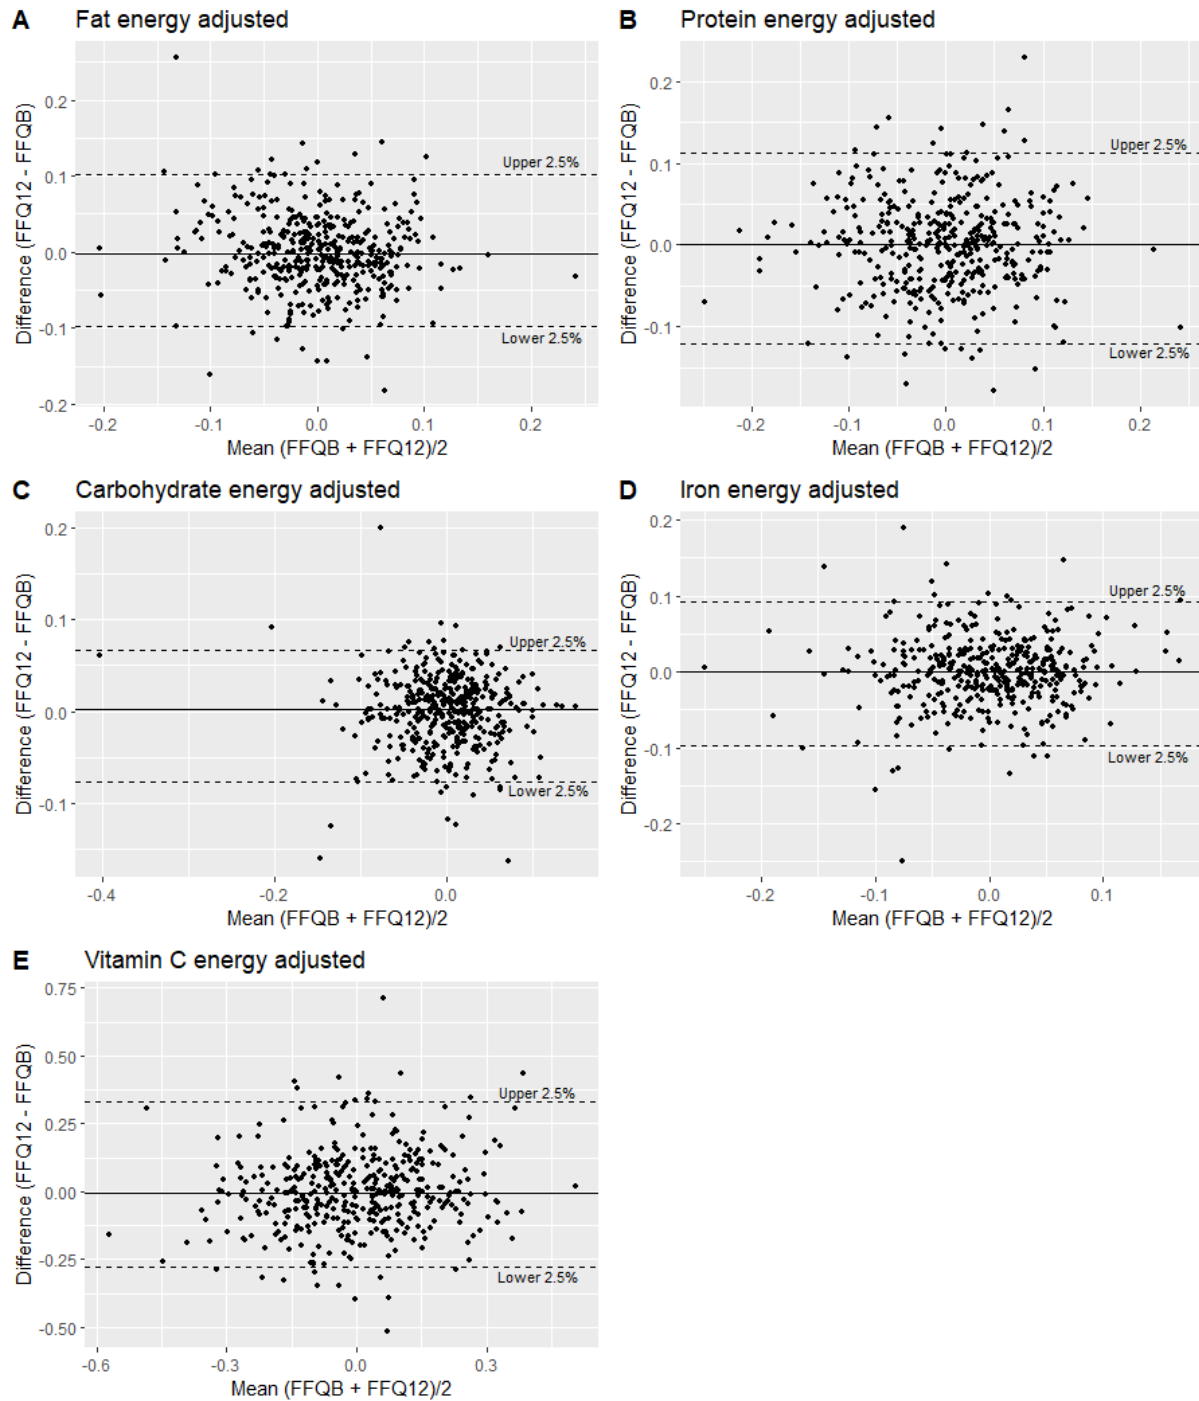

**Figure S2.** Bland-Altman plots comparing the FFQ<sub>baseline</sub> with the FFQ<sub>12months</sub> for nutrient residual intakes of: (A) fat, (B) protein, (C) carbohydrate, (D) iron and (E) vitamin C. The solid line illustrates the median difference, and the dotted lines illustrates the upper 2.5% and lower 2.5%. Energy-adjustment was performed using the residual method on double log-transformed nutrient intakes.
